# Supplementary material for: SLC4A10 impedes atherosclerosis by diminishing IFN-γ/GZMB levels of CD8+ T cells via the MAPK pathway
Source: Frontiers journal article supplement (doi:10.3389/fimmu.2025.1568999), 2025-05-29

# Panel 1

Gate out debris

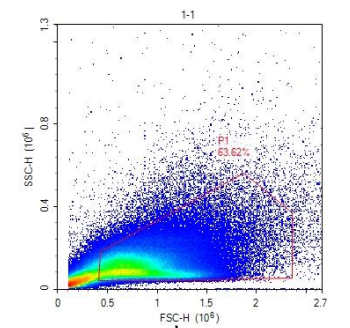

Gate target subgroup

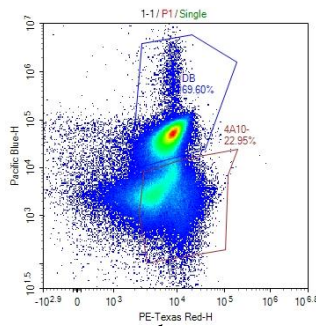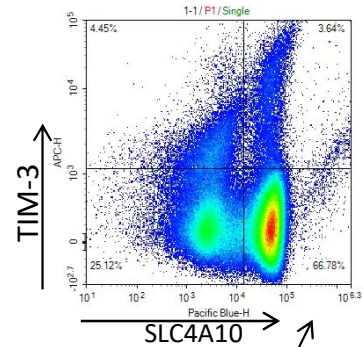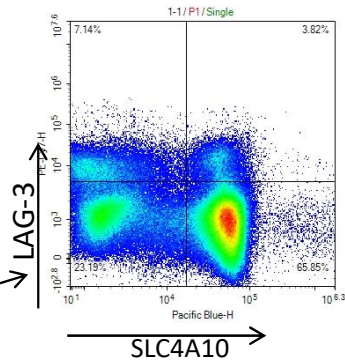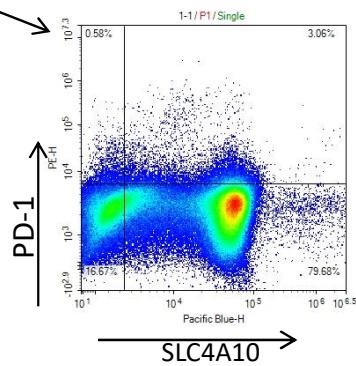

Gate out doublets

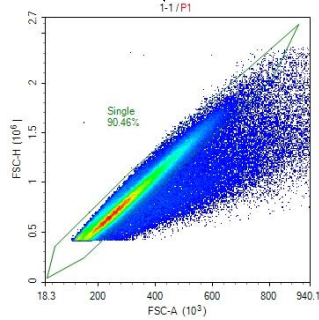

## Panel 2

Gate out debris

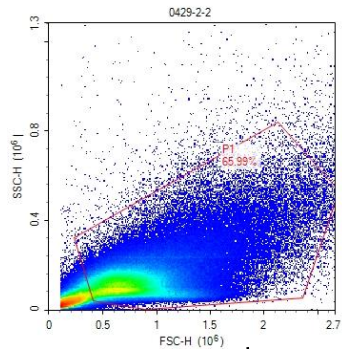

Gate out doublets

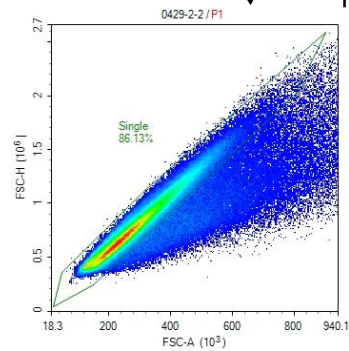

Gate target subgroup

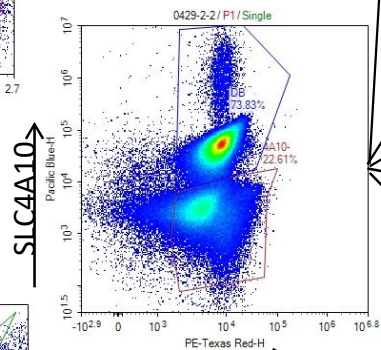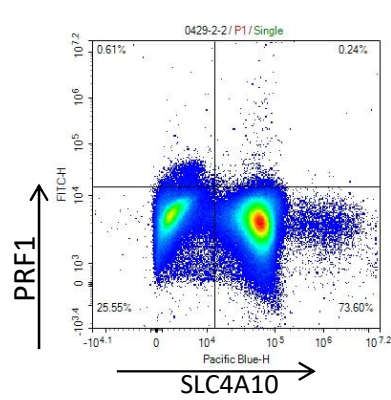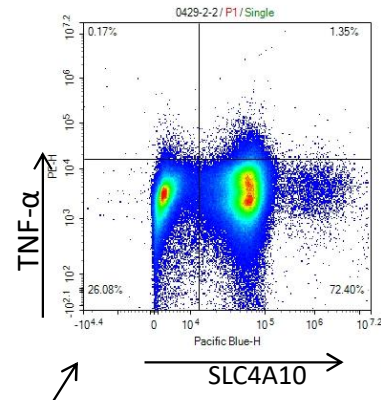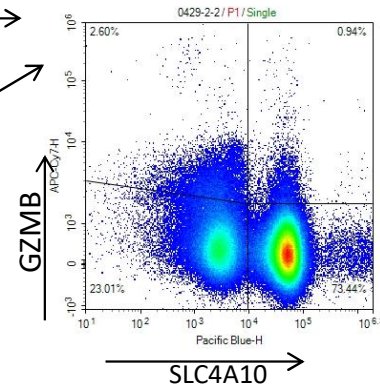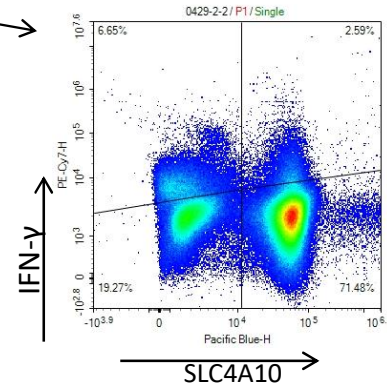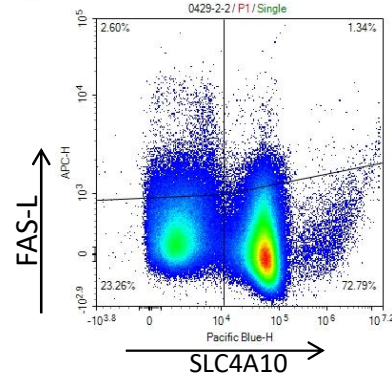

Supplement: Data_Sheet_1.zip [file Data_Sheet_1.zip]
