# Supplementary material for: SLC4A10 impedes atherosclerosis by diminishing IFN-γ/GZMB levels of CD8+ T cells via the MAPK pathway
Source: Frontiers journal article supplement (doi:10.3389/fimmu.2025.1568999), 2025-05-29
Supplement: Data_Sheet_1.zip [file Data_Sheet_1.zip]

## Sheet: IL-4
IL-4（ng/ml）	AAV-NONE	AAV-SLC4A10
Sample 1	2.3	3.67
Sample 2	2.33	3.1
Sample 3	2.36	3.14
Sample 4	2.4	3.29
Sample 5	2.43	3.52

## Sheet: IL-17A
IL-17A（ng/ml）	AAV-NONE	AAV-SLC4A10
Sample 1	74.94	138.99
Sample 2	99.9	182
Sample 3	103.4	186.56
Sample 4	130.26	189.06
Sample 5	133.94	271.7

## Sheet: IL-6
IL-6（ng/ml）	AAV-NONE	AAV-SLC4A10
Sample 1	1.5	2.75
Sample 2	2.31	4.31
Sample 3	2.51	5.21
Sample 4	2.73	5.46
Sample 5	2.83	7.39

## Sheet: IL-2
IL-2（ng/ml）	AAV-NONE	AAV-SLC4A10
Sample 1	3.31	3.68
Sample 2	4.16	3.77
Sample 3	4.18	3.99
Sample 4	4.4	4.45
Sample 5	4.42	4.92

## Sheet: IL-10
IL-10（ng/ml）	AAV-NONE	AAV-SLC4A10
Sample 1	9.58	6.45
Sample 2	13.85	9.26
Sample 3	18.98	11.49
Sample 4	30.83	11.63
Sample 5	31.25	27.32

## Sheet: GZMB
GZMB（ng/ml）	AAV-NONE	AAV-SLC4A10
Sample 1	21.66	17.18
Sample 2	27.46	17.66
Sample 3	29.91	18.82
Sample 4	33.59	20.7
Sample 5	33.71	21.37

## Sheet: PRF1
PRF1（ng/ml）	AAV-NONE	AAV-SLC4A10
Sample 1	26.24	19.35
Sample 2	47.58	24.98
Sample 3	54.61	30.87
Sample 4	88.12	35.56
Sample 5	109.17	39.04

## Sheet: IFN-γ
IFN-γ（ng/ml）	AAV-NONE	AAV-SLC4A10
Sample 1	26.24	19.35
Sample 2	47.58	24.98
Sample 3	54.61	30.87
Sample 4	88.12	35.56
Sample 5	109.17	39.04

## Sheet: TNF-α
TNF-α（ng/ml）	AAV-NONE	AAV-SLC4A10
Sample 1	3.89	1.87
Sample 2	4.03	2.17
Sample 3	4.6	3.31
Sample 4	4.61	4.29
Sample 5	6.56	4.67

## Sheet: HDL
HDL（ng/ml）	AAV-NONE	AAV-SLC4A10
Sample 1	298.5	247.32
Sample 2	285.1	133.74
Sample 3	194.19	324.28
Sample 4	218.39	297.69
Sample 5	280.96	106.7

[truncated: 3 more sheets: LDL, Triglycerides, Cholesterol]
