# Supplementary figures and images for: SLC4A10 impedes atherosclerosis by diminishing IFN-γ/GZMB levels of CD8+ T cells via the MAPK pathway
Source: Frontiers journal article supplement (doi:10.3389/fimmu.2025.1568999), 2025-05-29

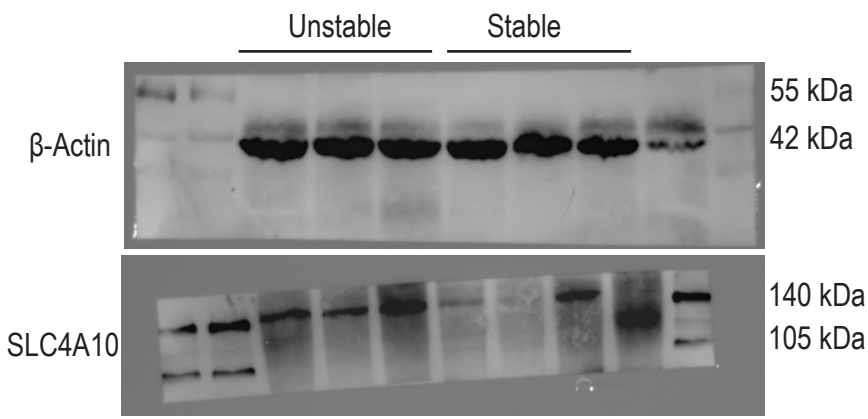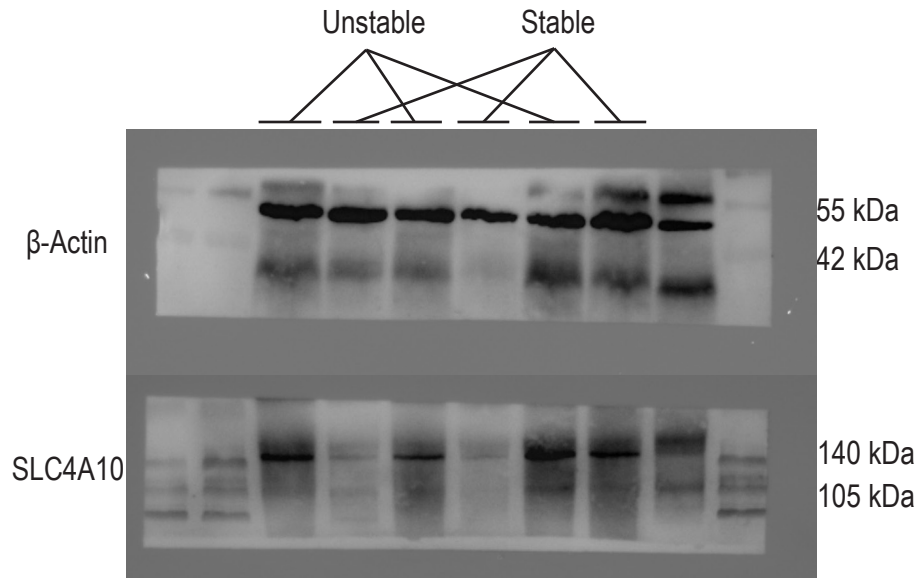

Supplement: Data_Sheet_1.zip [file Data_Sheet_1.zip]

AAV-NONE AAV-SLC4A10

$\beta$ -Actin

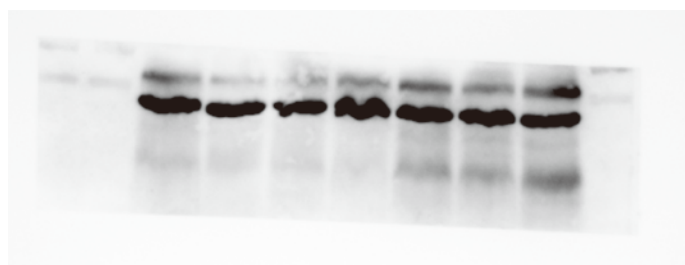

40 kDa

SLC4A10

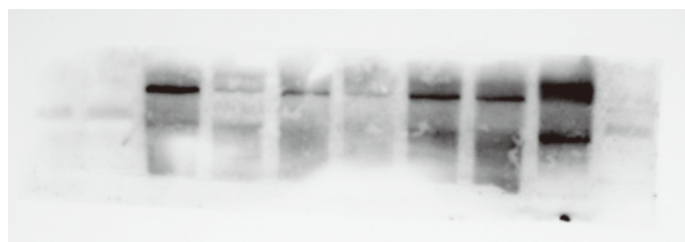

130 kDa

Supplement: Data_Sheet_1.zip [file Data_Sheet_1.zip]

AAV-NONE   AAV-SLC4A10

$\beta$ -Actin

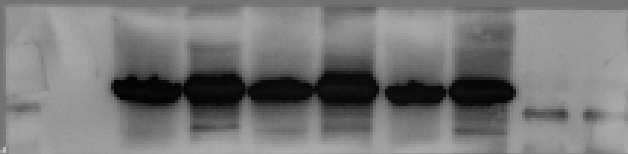

40 kDa

SLC4A10

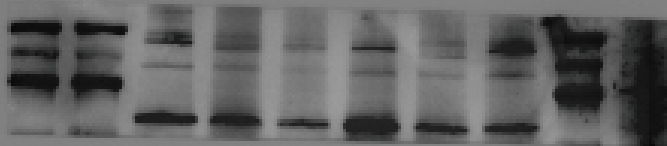

130 kDa

90 kDa

AAV-SLC4A10   AAV-NONE

$\beta$ -Actin

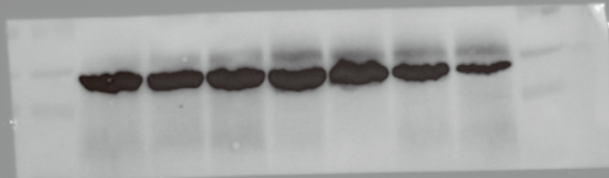

40 kDa

SLC4A10

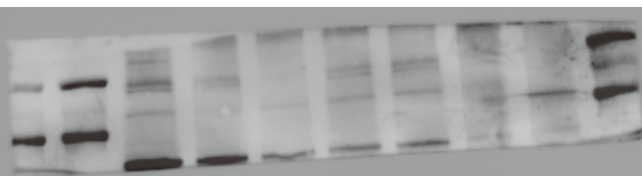

250 kDa

150 kDa

Supplement: Data_Sheet_1.zip [file Data_Sheet_1.zip]
